# Supplementary material
Source: Springer Nature journal article supplement (https://www.springermedizin.de/resource/supplementary/12985_2011_1575_MOESM2_ESM.pdf/9610088)

# Viral response

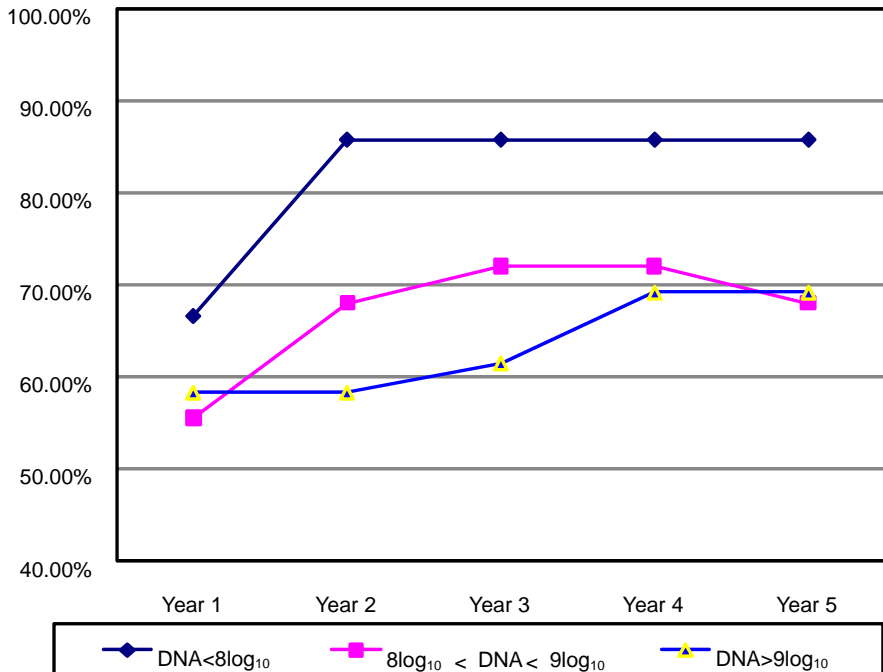

Supplement: MOESM2 [file 9610088]
